# Supplementary material for: Dietitians’ Attitudes and Beliefs Regarding Peer Education in Nutrition
Source: Atypon-hosted journal article supplement (doi:10.3148/cjdpr-2016-009), 2016-07-19
Supplement: cjdpr-2016-009suppl.pdf [file cjdpr-2016-009suppl.pdf]

**Supplementary Table 1: Respondent demographics**

|                                 | <b>n</b> | <b>%</b> |
|---------------------------------|----------|----------|
| <b>Age Group (n=225)</b>        |          |          |
| 20-29                           | 47       | 20.9     |
| 30-39                           | 39       | 17.3     |
| 40-49                           | 74       | 32.9     |
| 50-59                           | 54       | 24.0     |
| 60+                             | 11       | 4.9      |
| <b>Education (n=225)</b>        |          |          |
| Bachelors                       | 170      | 75.6     |
| Masters                         | 46       | 20.4     |
| PhD                             | 9        | 4.0      |
| <b>Area of Practice (n=218)</b> |          |          |
| Community/Public Health         | 57       | 26.1     |
| Clinical Practice               | 87       | 39.9     |
| Business and Industry           | 6        | 2.8      |
| Education and Government        | 11       | 5.0      |
| Food Service                    | 16       | 7.3      |
| Private Practice                | 10       | 4.6      |
| Long Term Care                  | 31       | 14.2     |
| <b>Province (n=225)</b>         |          |          |
| British Columbia                | 31       | 13.8     |
| Alberta                         | 29       | 12.9     |
| Saskatchewan                    | 12       | 5.3      |
| Manitoba                        | 24       | 10.7     |
| Ontario                         | 95       | 42.2     |
| Quebec                          | 2        | 0.9      |
| Maritimes                       | 30       | 13.1     |
| Territories                     | 2        | 0.9      |
| <b>Community Size (n=225)</b>   |          |          |
| Large Urban                     | 146      | 64.9     |
| Small Urban                     | 48       | 21.3     |
| Rural                           | 31       | 13.8     |
